# Supplementary material for: Element accumulation performance of living and dead lichens in a large-scale transplant application
Source: Springer Nature journal article supplement (doi:10.1007/s11356-020-11797-7), 2020-12-04
Supplement: MOESM1 [file 11356_2020_11797_MOESM1_ESM.pdf]

# Element accumulation performance of living and dead lichens in a large-scale transplant application

Elva Cecconi<sup>1§</sup>; Lorenzo Fortuna<sup>2§</sup>; Marco Peplis<sup>1</sup>; Mauro Tretiach<sup>1\*</sup>

<sup>1</sup>Department of Life Sciences, University of Trieste, Via L. Giorgieri 10, 34127 Trieste, Italy

<sup>2</sup>Department of Chemical and Pharmaceutical Science, University of Trieste, Via L. Girogieri 1, 34127 Trieste, Italy

§ These authors contributed equally to this work

\* Corresponding author:

Prof. Mauro Tretiach,

[tretiach@units.it](mailto:tretiach@units.it)

Via L. Giorgieri 10,

34127 Trieste, Italy

# **SUPPLEMENTARY MATERIAL**

**SUPPLEMENTARY METHODS S1.1-S1.2**

**SUPPLEMENTARY TABLES S1-S4**

**SUPPLEMENTARY FIGURES S1-S4**

**SUPPLEMENTARY REFERENCES**

## SUPPLEMENTARY METHODS S1

### S1.1 The study area

The study area covers c. 43.6 km<sup>2</sup>, and it is located at the foot of the Carnic Pre-Alps, including the municipalities of Fanna, Maniago, Cavasso Nuovo and Arba (Supplementary Fig. S2). According to the Köppen-Geiger climate classification, the study area has a temperate oceanic climate, with mean annual temperature and precipitation respectively ranging between 11.5 and 13.5 °C, and 1400 to 2000 mm (with c. 110 rainy days per year; Kottek et al., 2006; ARPA FVG, 2015). From a pedological point of view, the majority of the study area is characterized by silty-clay subalkaline soils, generally very drained. Limited to the central-northern portion of the study area, soils are mostly alluvial. The land use of the study area is quite heterogeneous, being characterized by a patchwork of forested, agricultural, urban and industrial areas (Bossard et al., 2000; Supplementary Table S2). The southern and eastern parts of the study area are mostly characterized by agricultural land use (maize, forage, and rapeseed crops) with the occurrence of several zootechnical activities. In the northern part, the urban land use prevails; the largest town is the municipality of Maniago (c. 11,700 inhabitants), connected to neighbouring smaller municipalities by a capillary road system (Kodnik et al., 2015, 2017).

The main point pollution source is a cement plant located in the municipality of Fanna (Buzzi Unicem SpA, 2345474 E, 5116064 N; Supplementary Fig. S2), and a large industrial park of 1.6 km<sup>2</sup> located in the south-western part of the study area (Supplementary Fig. S2), which hosts steel, metallurgical, and metal-alloy transformation activities for the production of aeronautical, medical and civil manufactures.

### S1.2 Land use characterization of the transplant sites

The 40 transplant sites were characterized in terms of land use using the Corine Land Cover map 2012 (Bossard et al., 2000) in GIS environment. The percent cover of urban (2<sup>nd</sup> order level '11'), industrial (2<sup>nd</sup> order level '12'), rural (1<sup>st</sup> order level '2') and natural (2<sup>nd</sup> order level '31') landcover was estimated within buffers of 125 m radius centred on each site. Sites were accordingly classified as urban, industrial, rural or natural when the percent cover of the corresponding class was higher than 50% (Supplementary Table S1).

## SUPPLEMENTARY TABLES S1-S4

**Supplementary Table S1.** List of transplant sites with alphanumeric identification codes (site ID), UTM coordinates, altitude and land use classification obtained considering the percent coverage of different CLC categories in circular buffers of 125 m radius centred in the transplant sites (Supplementary methods S1.1).

| Site ID       | UTM coordinates |         | Altitude<br>(m a.s.l.) | Land use   |
|---------------|-----------------|---------|------------------------|------------|
|               | E               | N       |                        |            |
| 1A            | 2343347         | 5116507 | 279                    | Natural    |
| 1B            | 2344025         | 5116735 | 324                    | Natural    |
| 1C            | 2344633         | 5116969 | 382                    | Natural    |
| 1D            | 2345383         | 5116934 | 299                    | Natural    |
| 1E            | 2346008         | 5117171 | 279                    | Urban      |
| 1F            | 2346755         | 5117276 | 270                    | Urban      |
| 2A            | 2343465         | 5115852 | 276                    | Urban      |
| 2B            | 2344060         | 5116095 | 270                    | Rural      |
| 2C            | 2344853         | 5116292 | 264                    | Rural      |
| 2D            | 2345549         | 5116006 | 253                    | Rural      |
| 2E            | 2346153         | 5116443 | 257                    | Rural      |
| 2F            | 2346845         | 5116601 | 254                    | Rural      |
| 3A            | 2343651         | 5115202 | 276                    | Urban      |
| 3B            | 2344315         | 5115216 | 267                    | Rural      |
| 3C            | 2344981         | 5115604 | 259                    | Rural      |
| 3D            | 2345739         | 5115575 | 248                    | Rural      |
| 3E            | 2346314         | 5115862 | 241                    | Rural      |
| 3F            | 2347092         | 5115850 | 242                    | Rural      |
| 4A            | 2343794         | 5114313 | 275                    | Urban      |
| 4B            | 2344503         | 5114672 | 263                    | Rural      |
| 4C            | 2345117         | 5114753 | 253                    | Rural      |
| 4D            | 2345854         | 5114939 | 236                    | Rural      |
| 4E            | 2346543         | 5115093 | 231                    | Rural      |
| 4F            | 2347088         | 5115190 | 229                    | Rural      |
| 5A            | 2343667         | 5113708 | 275                    | Rural      |
| 5B            | 2344595         | 5114199 | 264                    | Rural      |
| 5C            | 2345243         | 5114040 | 253                    | Rural      |
| 5D            | 2346052         | 5114223 | 240                    | Rural      |
| 5E            | 2346677         | 5114436 | 228                    | Rural      |
| 6A            | 2343855         | 5112999 | 268                    | Industrial |
| 6B            | 2344703         | 5113241 | 257                    | Industrial |
| 6C            | 2345404         | 5113217 | 248                    | Rural      |
| 6D            | 2346009         | 5113620 | 241                    | Rural      |
| 6E            | 2346775         | 5113701 | 231                    | Rural      |
| 7B            | 2344650         | 5112723 | 258                    | Rural      |
| 7C            | 2345533         | 5112752 | 245                    | Urban      |
| 7D            | 2346373         | 5112839 | 232                    | Rural      |
| Arba          | 2349472         | 5112557 | 210                    | Urban      |
| Cavasso Nuovo | 2348230         | 5118263 | 278                    | Urban      |
| Maniago       | 2341823         | 5114748 | 303                    | Urban      |

**Supplementary Table S2.** Lower Limit of Detection (LoD;  $\mu\text{g g}^{-1}$ ) and recovery percentages (calculated as the percentage ratio between the measured and the expected values) for two in-house standard materials (i.e., V16 and CDV-1). Recovery percentages lower than 70% are highlighted in bold.

| Element | LoD   | Standard materials |       |
|---------|-------|--------------------|-------|
|         |       | V16                | CDV-1 |
| Al      | 100   | 95.4               | 86.7  |
| As      | 0.1   | 89.6               | 82.1  |
| Ba      | 0.1   | 92.4               | 98.2  |
| Bi      | 0.02  | -                  | -     |
| Ca      | 100   | 96.7               | 93.3  |
| Cd      | 0.01  | 89.2               | 83.3  |
| Co      | 0.01  | 76.6               | 86.3  |
| Cr      | 0.1   | 72.6               | 91.5  |
| Cu      | 0.01  | 80.1               | 84.5  |
| Fe      | 10    | 81.0               | 95.8  |
| Hg      | 0.001 | 100.7              | 108.9 |
| K       | 100   | 90.9               | 87.0  |
| Mg      | 10    | 94.0               | 96.4  |
| Mn      | 1     | 90.7               | 94.5  |
| Mo      | 0.01  | 75.4               | 85.0  |
| Na      | 10    | <b>66.7</b>        | 96.2  |
| Ni      | 0.1   | 77.1               | 83.3  |
| P       | 10    | 97.1               | 73.6  |
| Pb      | 0.01  | 93.1               | 86.0  |
| S       | 500   | -                  | 83.3  |
| Sb      | 0.02  | <b>47.6</b>        | -     |
| Sr      | 0.5   | 95.8               | 96.5  |
| Ti      | 1     | 82.6               | 74.4  |
| Zn      | 0.1   | 85.3               | 86.3  |

**Supplementary Table S3.** Descriptive statistics (mean  $\pm$  standard deviation, 95% confidence interval, median and range) of element concentration data ( $\mu\text{g g}^{-1}$ ) in living and dead *Pseudevernia furfuracea* samples, along with the output of the Wilcoxon test for paired samples (*p*-values  $< 0.05$  are reported in italic). Element content values for unexposed (n = 10) and exposed samples (n = 39) are reported in the first and second row, respectively.

| Element | Living samples    |               |        |               | Devitalized samples |               |        |               | Wilcoxon |                                        |
|---------|-------------------|---------------|--------|---------------|---------------------|---------------|--------|---------------|----------|----------------------------------------|
|         | Mean $\pm$ SD     | C.I. 95%      | Median | Range         | Mean $\pm$ SD       | C.I. 95%      | Median | Range         | Z        | <i>p</i> -value                        |
| Al      | 210 $\pm$ 32      | 187 - 233     | 200    | 200 - 300     | 160 $\pm$ 52        | 123 - 197     | 200    | 100 - 200     | 1.83     | 0.068                                  |
|         | 244 $\pm$ 50      | 227 - 260     | 200    | 200 - 300     | 277 $\pm$ 48        | 261 - 293     | 300    | 200 - 400     | 2.49     | <i>0.013</i>                           |
| As      | 0.19 $\pm$ 0.07   | 0.14 - 0.24   | 0.20   | 0.10 - 0.3    | 0.22 $\pm$ 0.16     | 0.10 - 0.34   | 0.15   | 0.10 - 0.60   | 0.07     | 0.944                                  |
|         | 0.12 $\pm$ 0.04   | 0.11 - 0.14   | 0.10   | 0.10 - 0.20   | 0.22 $\pm$ 0.13     | 0.18 - 0.26   | 0.20   | 0.10 - 0.50   | 3.39     | <i>0.001</i>                           |
| Ba      | 12.8 $\pm$ 2.2    | 11.2 - 14.3   | 12.8   | 9.9 - 16.4    | 13.6 $\pm$ 2.7      | 11.7 - 15.4   | 12.9   | 10.3 - 19.4   | 0.87     | 0.386                                  |
|         | 14.3 $\pm$ 2.7    | 13.4 - 15.1   | 14.0   | 10.1 - 20.6   | 16.1 $\pm$ 2.7      | 15.2 - 16.9   | 16.5   | 11.1 - 21.0   | 3.21     | <i>0.001</i>                           |
| Bi      | 0.02 $\pm$ 0.00   | -             | 0.02   | 0.02 - 0.02   | 0.02 $\pm$ 0.00     | -             | 0.02   | 0.02 - 0.02   | 0.00     | -                                      |
|         | 0.03 $\pm$ 0.02   | -             | 0.03   | 0.02 - 0.07   | 0.03 $\pm$ 0.01     | -             | 0.03   | 0.02 - 0.08   | 1.17     | 0.242                                  |
| Ca      | 4180 $\pm$ 922    | 3520 - 4840   | 4300   | 2700 - 5500   | 3820 $\pm$ 935      | 3151 - 4489   | 3500   | 2600 - 5800   | 0.82     | 0.415                                  |
|         | 4377 $\pm$ 799    | 4118 - 4636   | 4300   | 3100 - 6600   | 4738 $\pm$ 1078     | 4389 - 5088   | 4600   | 3100 - 7000   | 2.14     | <i>0.032</i>                           |
| Cd      | 0.09 $\pm$ 0.01   | 0.08 - 0.10   | 0.09   | 0.07 - 0.11   | 0.08 $\pm$ 0.01     | 0.08 - 0.09   | 0.09   | 0.06 - 0.10   | 1.48     | 0.138                                  |
|         | 0.11 $\pm$ 0.03   | 0.10 - 0.12   | 0.10   | 0.07 - 0.26   | 0.11 $\pm$ 0.02     | 0.11 - 0.12   | 0.11   | 0.07 - 0.15   | 1.47     | 0.142                                  |
| Co      | 0.13 $\pm$ 0.03   | 0.11 - 0.15   | 0.14   | 0.08 - 0.16   | 0.13 $\pm$ 0.02     | 0.11 - 0.14   | 0.13   | 0.09 - 0.16   | 0.36     | 0.721                                  |
|         | 0.16 $\pm$ 0.03   | 0.15 - 0.17   | 0.16   | 0.10 - 0.22   | 0.18 $\pm$ 0.03     | 0.17 - 0.19   | 0.18   | 0.10 - 0.23   | 3.31     | <i>0.001</i>                           |
| Cr      | 2.4 $\pm$ 0.3     | 2.1 - 2.6     | 2.3    | 2.0 - 3.0     | 2.2 $\pm$ 0.3       | 2.0 - 2.4     | 2.2    | 1.9 - 2.7     | 0.51     | 0.612                                  |
|         | 2.9 $\pm$ 0.6     | 2.7 - 3.1     | 2.8    | 1.8 - 4.8     | 3.0 $\pm$ 1.1       | 2.6 - 3.4     | 2.7    | 2.3 - 7.9     | 0.09     | 0.925                                  |
| Cu      | 4.10 $\pm$ 0.98   | 3.40 - 4.80   | 3.86   | 3.21 - 6.39   | 3.51 $\pm$ 0.49     | 3.16 - 3.86   | 3.37   | 2.98 - 4.52   | 1.27     | 0.203                                  |
|         | 6.87 $\pm$ 1.95   | 6.23 - 7.50   | 6.43   | 4.61 - 13.72  | 7.28 $\pm$ 3        | 6.31 - 8.25   | 6.64   | 4.41 - 20.45  | 0.54     | 0.591                                  |
| Fe      | 233 $\pm$ 33      | 209 - 257     | 235    | 190 - 290     | 194 $\pm$ 32        | 171 - 217     | 195    | 150 - 250     | 2.07     | <i>0.038</i>                           |
|         | 309 $\pm$ 58      | 290 - 327     | 310    | 210 - 400     | 332 $\pm$ 59        | 313 - 351     | 330    | 190 - 480     | 1.92     | 0.055                                  |
| Hg      | 0.155 $\pm$ 0.018 | 0.142 - 0.168 | 0.150  | 0.136 - 0.200 | 0.118 $\pm$ 0.014   | 0.107 - 0.128 | 0.122  | 0.097 - 0.136 | 2.80     | <i>0.005</i>                           |
|         | 0.137 $\pm$ 0.019 | 0.131 - 0.143 | 0.136  | 0.107 - 0.173 | 0.136 $\pm$ 0.023   | 0.128 - 0.143 | 0.131  | 0.100 - 0.188 | 0.59     | 0.558                                  |
| K       | 2770 $\pm$ 221    | 2612 - 2928   | 2750   | 2500 - 3300   | 2720 $\pm$ 103      | 2646 - 2794   | 2700   | 2600 - 2900   | 0.41     | 0.683                                  |
|         | 2100 $\pm$ 355    | 1985 - 2215   | 2100   | 1400 - 2800   | 646 $\pm$ 309       | 546 - 746     | 600    | 200 - 1800    | 5.44     | <i>5.3 <math>\times 10^{-8}</math></i> |
| Mg      | 727 $\pm$ 65      | 681 - 773     | 735    | 580 - 830     | 768 $\pm$ 121       | 681 - 855     | 785    | 600 - 930     | 0.97     | 0.333                                  |
|         | 846 $\pm$ 120     | 807 - 885     | 830    | 620 - 1120    | 956 $\pm$ 156       | 905 - 1006    | 940    | 700 - 1400    | 3.79     | <i>1.5 <math>\times 10^{-4}</math></i> |
| Mn      | 94 $\pm$ 21       | 79 - 109      | 99     | 48 - 128      | 108 $\pm$ 34        | 84 - 132      | 116    | 65 - 173      | 1.07     | 0.285                                  |
|         | 93 $\pm$ 24       | 86 - 101      | 93     | 45 - 148      | 119 $\pm$ 40        | 106 - 132     | 108    | 61 - 294      | 2.91     | <i>0.004</i>                           |
| Mo      | 0.14 $\pm$ 0.02   | 0.12 - 0.15   | 0.14   | 0.11 - 0.17   | 0.13 $\pm$ 0.02     | 0.11 - 0.14   | 0.13   | 0.10 - 0.15   | 1.36     | 0.173                                  |
|         | 0.21 $\pm$ 0.07   | 0.19 - 0.23   | 0.20   | 0.11 - 0.53   | 0.15 $\pm$ 0.07     | 0.13 - 0.17   | 0.12   | 0.09 - 0.49   | 4.76     | <i>1.9 <math>\times 10^{-6}</math></i> |
| Na      | 20 $\pm$ 0        | -             | 20     | 20 - 20       | 22 $\pm$ 4          | 19 - 25       | 20     | 20 - 30       | 1.34     | 0.180                                  |
|         | 15 $\pm$ 5        | -             | 20     | 10 - 20       | 12 $\pm$ 4          | 11 - 13       | 10     | 10 - 20       | 2.48     | <i>0.013</i>                           |
| Ni      | 0.8 $\pm$ 0.2     | 0.7 - 0.9     | 0.7    | 0.6 - 1.2     | 0.7 $\pm$ 0.1       | 0.6 - 0.8     | 0.7    | 0.6 - 0.9     | 1.40     | 0.161                                  |
|         | 1.1 $\pm$ 0.4     | 1.0 - 1.3     | 1.0    | 0.7 - 2.6     | 1.2 $\pm$ 0.6       | 1.0 - 1.4     | 1.0    | 0.6 - 3.7     | 0.81     | 0.416                                  |
| P       | 485 $\pm$ 115     | 402 - 568     | 475    | 370 - 770     | 454 $\pm$ 75        | 401 - 507     | 455    | 340 - 600     | 0.65     | 0.515                                  |
|         | 477 $\pm$ 77      | 452 - 502     | 470    | 290 - 660     | 151 $\pm$ 76        | 126 - 176     | 140    | 100 - 590     | 5.43     | <i>5.7 <math>\times 10^{-8}</math></i> |
| Pb      | 1.84 $\pm$ 0.23   | 1.67 - 2.00   | 1.82   | 1.47 - 2.18   | 1.50 $\pm$ 0.17     | 1.38 - 1.62   | 1.49   | 1.30 - 1.86   | 2.19     | <i>0.028</i>                           |
|         | 2.05 $\pm$ 0.32   | 1.95 - 2.16   | 1.97   | 1.49 - 2.93   | 2.22 $\pm$ 0.34     | 2.11 - 2.33   | 2.19   | 1.36 - 3.11   | 2.34     | <i>0.019</i>                           |
| S       | 790 $\pm$ 208     | 641 - 939     | 800    | 500 - 1200    | 620 $\pm$ 123       | 532 - 708     | 600    | 500 - 800     | 1.58     | 0.114                                  |
|         | 810 $\pm$ 139     | 765 - 855     | 800    | 500 - 1100    | 528 $\pm$ 89        | 499 - 557     | 500    | 500 - 1000    | 4.74     | <i>2.1 <math>\times 10^{-6}</math></i> |
| Sb      | 0.03 $\pm$ 0.01   | 0.02 - 0.03   | 0.02   | 0.02 - 0.04   | 0.02 $\pm$ 0.00     | 0.02 - 0.02   | 0.02   | 0.02 - 0.03   | 1.60     | 0.109                                  |
|         | 0.05 $\pm$ 0.02   | 0.04 - 0.06   | 0.05   | 0.02 - 0.09   | 0.05 $\pm$ 0.02     | 0.04 - 0.05   | 0.05   | 0.02 - 0.11   | 1.10     | 0.271                                  |
| Sr      | 14.6 $\pm$ 4.4    | 11.5 - 17.8   | 13.7   | 10.1 - 22.5   | 11.8 $\pm$ 2.7      | 9.8 - 13.8    | 11.5   | 7.9 - 17.4    | 1.48     | 0.139                                  |
|         | 13.3 $\pm$ 2.9    | 12.4 - 14.2   | 13.0   | 8.6 - 23.7    | 14.7 $\pm$ 4.8      | 13.1 - 16.3   | 13.3   | 8.3 - 29      | 1.55     | 0.121                                  |
| Ti      | 4.1 $\pm$ 0.7     | 4.0 - 5.0     | 4.0    | 3.0 - 5.0     | 3.3 $\pm$ 0.5       | 3.0 - 4.0     | 3.0    | 3.0 - 4.0     | 1.94     | 0.052                                  |
|         | 5.1 $\pm$ 1.0     | 5.0 - 5.0     | 5.0    | 4.0 - 8.0     | 6.3 $\pm$ 0.9       | 5.0 - 6.0     | 6.0    | 3.0 - 7.0     | 1.73     | 0.083                                  |
| Zn      | 20.9 $\pm$ 2.2    | 19.4 - 22.5   | 21.4   | 16.8 - 24.2   | 19.1 $\pm$ 1.9      | 17.8 - 20.4   | 19.3   | 15.7 - 21.6   | 1.38     | 0.169                                  |
|         | 24.4 $\pm$ 3.2    | 23.3 - 25.4   | 24.2   | 19.4 - 31.6   | 25 $\pm$ 3.9        | 23.7 - 26.3   | 24.1   | 19.2 - 37.9   | 0.68     | 0.494                                  |

**Supplementary Table S4.** *EU* ratio, percentile-based, five-class interpretative scale for bioaccumulation data (i.e., Bioaccumulation Scale) for lichen transplants (Cecconi et al., 2019). Class codes, description and abbreviations, percentile thresholds, and the corresponding *EU* values associated with bioaccumulation classes are reported.

| <b>Bioaccumulation class</b> |                                   | <b>Percentile thresholds</b>           | <b><i>EU</i> ratio (8 weeks)</b> |
|------------------------------|-----------------------------------|----------------------------------------|----------------------------------|
| <b>ID</b>                    | <b>Description (abbreviation)</b> |                                        |                                  |
| 1                            | Absence of bioaccumulation (A)    | $\leq 25^{\text{th}}$                  | $\leq 1.0$                       |
| 2                            | Low bioaccumulation (L)           | (25 <sup>th</sup> , 75 <sup>th</sup> ] | (1.0, 1.9]                       |
| 3                            | Moderate bioaccumulation (M)      | (75 <sup>th</sup> , 90 <sup>th</sup> ] | (1.9, 2.7]                       |
| 4                            | High bioaccumulation (H)          | (90 <sup>th</sup> , 95 <sup>th</sup> ] | (2.7, 3.5]                       |
| 5                            | Severe bioaccumulation (S)        | $> 95^{\text{th}}$                     | $> 3.5$                          |

## SUPPLEMENTARY FIGURES S1-S4

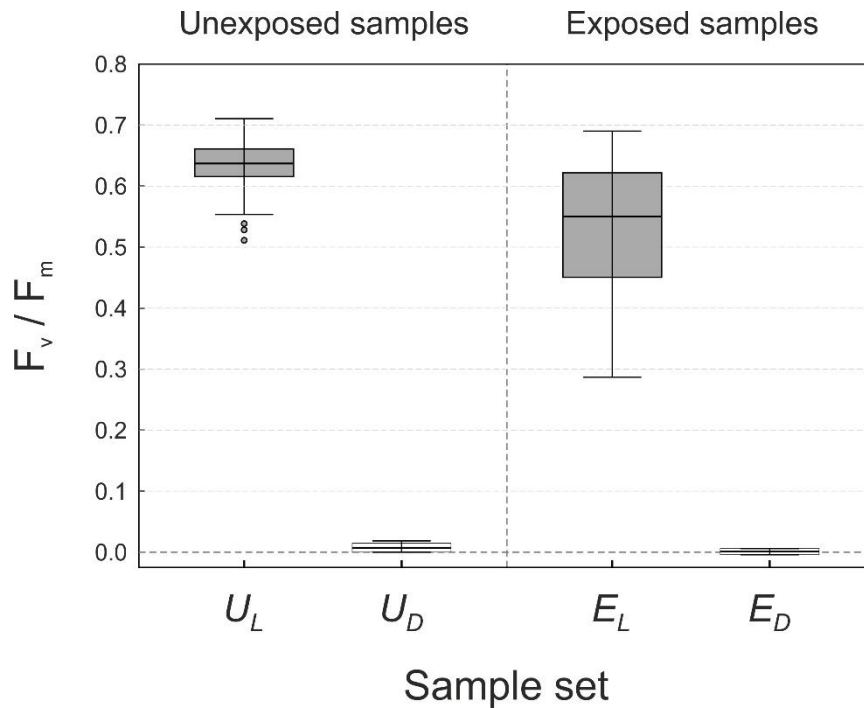

**Supplementary Figure S1.** Results of the post-storage  $Chl_aF$  assessment on unexposed and exposed sample sets ( $U_L$ : unexposed living samples, i.e. stored for 18 months at  $-20^\circ\text{C}$ ;  $U_D$ : unexposed devitalized samples, i.e. dark-stored at c.  $10^\circ\text{C}$  for 18 months;  $E_L$ : living samples exposed for 6 weeks in the study area;  $E_D$ : devitalized samples exposed for 6 weeks in the study area). Boxplots show median  $F_v/F_m$  values, interquartile ranges, minima and maxima, and outlier values (circles).

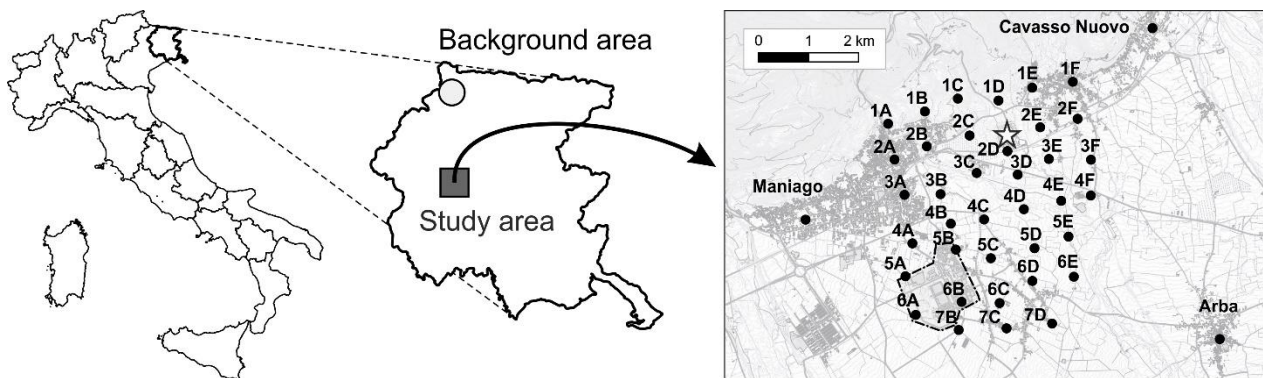

**Supplementary Figure S2.** Localization of the study area and the background area (for the collection of lichen samples), with indication of the transplant sites of *Pseudevernia furfuracea* labelled by alphanumeric codes (1A - 7D plus Arba, Cavasso Nuovo and Maniago). The two main putative pollution sources, a medium-sized cement plant and an industrial park, are respectively indicated by a star and a closed dashed line.



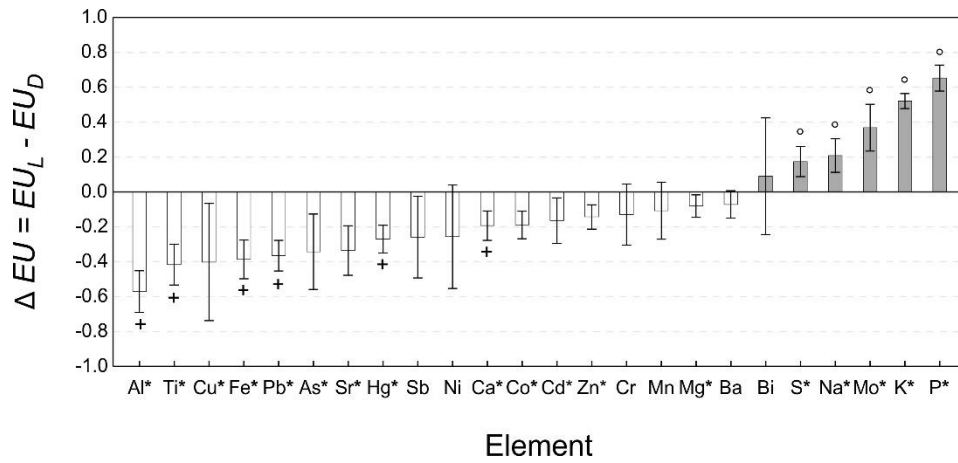

**Supplementary Figure S3.** Bar charts showing mean differences between *EU* ratio values of living (*L*) and dead (*D*) *P. furfuracea* samples ( $\Delta EU$ ) (error bars indicate 95% confidence intervals). Elements showing higher *EU* ratio values in more than 80% of transplant sites in either *L* or *D* samples are respectively marked with circles or crosses. Asterisks next to element labels indicate significant differences between the sample sets, according to the Wilcoxon signed rank test for paired samples (cf. Fig. 3 and Table 1).

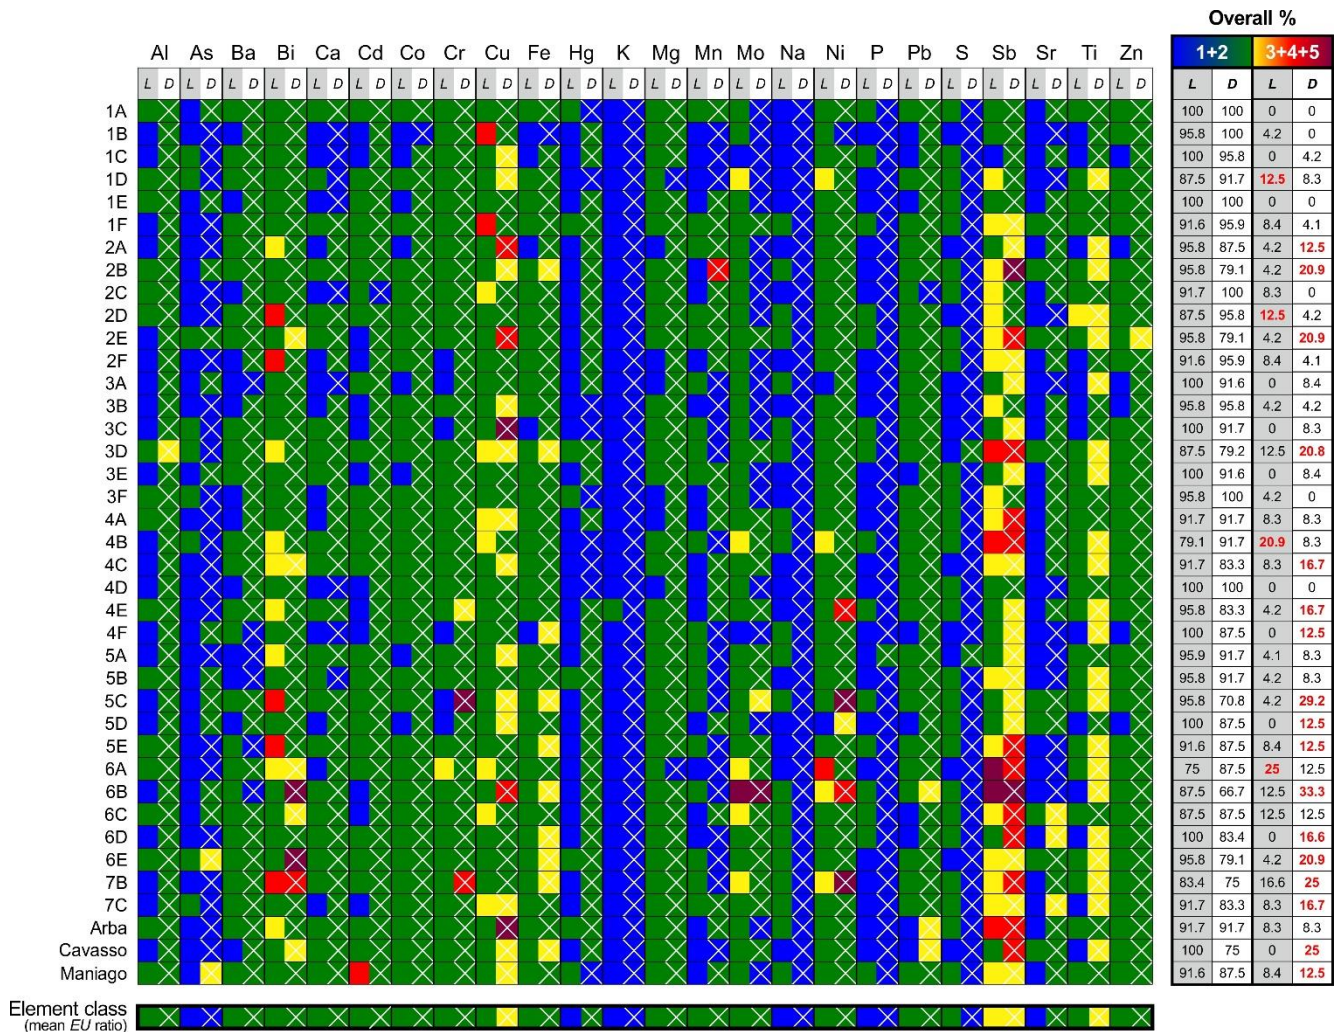

**Supplementary Figure S4.** Classification of the transplant sites according to the analytical results in living (*L*, unmarked cells) and devitalized (*D*, cross-marked cells) samples, as resulting from the Bioaccumulation Scale for 8-week transplants (Supplementary Table S4). The element class, calculated by averaging *EU* ratios by column, is reported at the bottom of the figure (element class). The overall percent of elements in classes 1 and 2, as well as in classes 3, 4 and 5, is also reported site per site (limited to the sum of classes 3-5, percentages higher than 10% are highlighted in red).

## SUPPLEMENTARY REFERENCES

ARPA FVG (2015)

[http://www.meteo.fvg.it/clima/clima\\_fvg/02\\_documenti\\_descrittivi\\_e\\_approfondimenti/01\\_Il\\_clima\\_del\\_Friuli\\_Venezia\\_Giulia/clima\\_fvg-divulgativo.pdf](http://www.meteo.fvg.it/clima/clima_fvg/02_documenti_descrittivi_e_approfondimenti/01_Il_clima_del_Friuli_Venezia_Giulia/clima_fvg-divulgativo.pdf)

Bossard M, Feranec J, Otahel J (2000) CORINE Land Cover Technical Guide - Addendum 2000. Technical Report 40, European Environment Agency, Copenhagen.

Cecconi E, Fortuna L, Benesperi R, Bianchi E, Brunialti G, Contardo T, Di Nuzzo L, Frati L, Monaci F, Munzi S, Nascimbene J, Paoli L, Ravera S, Vannini A, Giordani P, Loppi S, Tretiach M (2019) New interpretative scales for lichen bioaccumulation data: the Italian proposal. *Atmosphere* 10, 136-154.

Kodnik D, Candotto Carniel C, Licen S, Tolloi A, Barbieri P, Tretiach M (2015) Seasonal variations of PAHs content and distribution patterns in a mixed land use area: A case study in NE Italy with the transplanted lichen *Pseudevernia furfuracea*. *Atmos Environ* 113, 255-263.

Kodnik D, Winkler A, Candotto Carniel F, Tretiach M (2017) Biomagnetic monitoring and element content of lichen transplants in a mixed land use area of NE Italy. *Sci Total Environ* 595, 858-867.

Kottek M, Grieser J, Beck C, Rudolf B, Rubel F (2006) World map of the Köppen-Geiger climate classification updated. *Meteorologische Zeitschrift* 15, 259-263.
